## 8 **Abstract**

9 The mechanisms that maintain reproductive division of labor in social insects are still  
10 incompletely understood. Most studies focus on the relationship between adults, overlooking  
11 another important stakeholder in the game – the juvenile offspring. Recent studies from various  
12 social species show that not only the queen, but also the brood regulates reproductive division of  
13 labor between females, but how the two coordinate to maintain reproductive monopoly remained  
14 unexplored.

15 Our study aims at disentangling the roles of the brood and the queen in regulating worker  
16 reproduction in primitively eusocial bees. We examined the effects induced by the brood and  
17 queen, separately and together, on the behavioral, physiological and brain gene expression of  
18 *Bombus impatiens* workers. We found that young larvae induce a releaser effect in workers,  
19 decreasing egg laying and aggressive behaviors, while the queen induces both releaser and primer  
20 effects, modifying worker aggressive and egg laying behavior and reproductive physiology. The  
21 expression of reproduction- and aggression-related genes was altered in the presence of both  
22 queen and brood, but the effect was stronger or the same in the presence of the queen.

23 We identified two types of interactions between the queen and the brood in regulating worker  
24 reproduction: (1) synergistic interactions regulating worker physiology, where the combined  
25 effect of the queen and the brood was greater than each of them separately; (2) additive  
26 interactions regulating worker behavior, where the combined effects of the queen and the brood  
27 are the gross sum of their separated effects. In these interactions the brood acted in a manner  
28 similar to the queen but to a much smaller extent and improved the quality of the effect induced  
29 by the queen. Our results suggest that the queen and the brood of primitively eusocial bees  
30 coordinate synergistically, additively, and sometimes even redundantly to regulate worker  
31 behavior and reproduction, and the interaction between them exists in multiple regulatory levels.

32

### 33 **Introduction**

34 Reproductive division of labor is the defining feature of insect sociality. It exists in a variety of  
35 forms across multiple species, ranging from a modest reproductive skew by a few dominant,  
36 morphologically-identical females, to a complete monopolization of reproduction by a single  
37 queen (Wilson, 1971). However, the understanding of both the proximate and the ultimate causes  
38 of reproductive division of labor is incomplete. Pheromonal signaling and behavioral interactions  
39 are considered the most common mechanisms used by the colony members to enforce  
40 reproductive monopoly (Kocher and Grozinger, 2011). However, the different parties regulating  
41 worker reproduction and their relative roles remain largely unexplored.

42 Most proximate studies examining the regulation of reproduction have focused on interactions  
43 between adult members of insect societies, overlooking the potential role of juveniles. In a variety  
44 of species, queen's behavior and pheromonal signaling, as well as interactions between nestmate  
45 workers, were found to affect worker reproduction (Ronai et al., 2016; Wenseleers et al., 2004).  
46 Queen pheromones have been identified in a small number of species (Hefetz, 2019; Le Conte  
47 and Hefetz, 2008) and possible mechanisms of their action are still debated (Keller and Nonacs,  
48 1993; Smith and Liebig, 2017; Villalta et al., 2018), but queens and workers are not the only  
49 parties to the conflict over reproduction in social societies. Juveniles also hold stakes in the matter  
50 and are involved in reproductive conflict with other juveniles and adults (Ebie et al., 2015;  
51 Schultner et al., 2017; Starkey et al., 2019a; Starkey et al., 2019b; Ulrich et al., 2016a).

52 The main point of contention between juvenile and their caregivers lies in the fact that offspring  
53 are selected to demand more parental investment than parents are selected to provide (Trivers,  
54 1972), resulting in a conflict over resource allocation between current brood and future  
55 generations (inter-brood conflict). This tradeoff is not unique to social animals and is well  
56 documented in both non-social vertebrates (Calisi et al., 2016; Weir and Rowlands, 1973), and  
57 invertebrates (Schultner et al., 2017). However, it is often overlooked in social insect studies, that  
58 are centered around the role of royals in shaping the social structure of the colony. One exception  
59 is the honey bee *Apis mellifera* where the role of brood was extensively examined, showing that  
60 pheromones produced by the brood regulate worker reproduction and maturation (Maisonnasse et  
61 al., 2010; Maisonnasse et al., 2009; Mohammedi et al., 1998). Several recent studies further  
62 highlight the role of brood in regulating worker reproduction and behavior in ants (Ebie et al.,

63 2015; Ulrich et al., 2016b) and bumble bees (Starkey et al., 2019a). However, even in these  
64 species, the interplay between the roles of juveniles and adults remained understudied, partly  
65 because in eusocial insect societies, queen and brood exert their influence on workers  
66 simultaneously, and the effects of the queen and the juveniles are difficult to disentangle.

67 Derived eusocial species are less informative about the mechanisms regulating reproduction  
68 since, in many cases, they reached ‘a point of no return’ where worker sterility can no longer  
69 reversed. The bumble bee *Bombus impatiens* is an excellent model system to study the effects of  
70 brood and queen on reproductive division of labor, since they are a primitively eusocial species  
71 with relatively small colonies, limited morphological differences between castes (Amsalem et al.,  
72 2015a; Michener, 1974) and high rates of worker reproduction (Alaux et al., 2004; Cnaani et al.,  
73 2002). Previous studies in bumble bees show that the queen inhibits worker reproduction during  
74 the first part of the social life cycle, but loses the ability to exert reproductive dominance later on  
75 during the ‘competition phase’, where the workers and the queen compete over male production  
76 (Cnaani et al., 2002; Duchateau and Velthuis, 1988; Padilla et al., 2016). Various chemical  
77 signals are produced by the queen or found in the wax, and although found to correlate with the  
78 queen’s fecundity in several cases (Amsalem et al., 2014a; Amsalem et al., 2015b; Rottler et al.,  
79 2013; Sramkova et al., 2008), are insufficient to inhibit worker reproduction independently from a  
80 freely behaving queen (Amsalem et al., 2015b; Amsalem et al., 2017; Padilla et al., 2016; Rottler-  
81 Hoermann et al., 2016; Van Oystaeyen et al., 2014).

82 Recent findings suggest that also the brood plays a role in the inhibition of worker reproduction in  
83 *B. impatiens* (Starkey et al., 2019a; Starkey et al., 2019b). Young, but not old larvae, reduced egg  
84 laying but not ovary activation in workers in a quantity-dependent manner, with nearly complete  
85 suppression of egg laying in groups containing two workers and 10 young larvae (Starkey et al.,  
86 2019a). This effect is unlikely to be solely mediated via pheromones and, similar to the queen’s  
87 impact on workers, requires a physical contact between the workers and the brood (Starkey et al.,  
88 2019b). The larval effects were independent of relatedness between the workers and the brood,  
89 brood sex or worker age, with both newly emerged workers or random-age workers showing the  
90 same pattern of response in the presence of brood (Starkey et al., 2019a). Larvae and pupae  
91 effects were examined using encased brood, however the wax itself or its extracts, although found  
92 to reduce ovary activation and aggression in small queen-right *B. terrestris* workers (Rottler-  
93 Hoermann et al., 2016), had no effect on worker reproduction in *B. impatiens* (Starkey et al.,

94 2019a; Starkey et al., 2019b). Overall, both the brood and the queen affect *B. impatiens* worker  
95 reproduction, however, the respective roles of the brood and the queen and how they interact to  
96 regulate worker reproduction remained unresolved.

97 Our study endeavors to examine this question by studying the effects of the queen and the brood  
98 on worker reproduction at multiple regulatory levels, including worker reproductive physiology,  
99 egg laying and brood care behavior, aggressive behavior, and brain gene expression. In the first  
100 experiment we grouped pairs of workers with a queen, brood, both or none, and examined their  
101 effect on worker oocyte size and egg laying behavior. In the second experiment, we allowed pairs  
102 of workers to directly or indirectly interact with a queen, brood or both, and measured their  
103 aggressiveness and brood care behaviors. In the last experiment, we grouped pairs of workers  
104 with different types of brood (pupae, larvae, wax or none) or with a queen, brood, both or none,  
105 and measured the expression levels of four candidate genes in worker brains. All genes were  
106 previously found to regulate reproduction and/or aggression in bumble bee workers. We analyze  
107 the interactions between the queen and the brood in regulating worker reproduction and discuss  
108 possible mechanisms of reproductive regulation at different regulatory levels and by different  
109 players.

## 110 **Methods**

111 *General bumble bee rearing:* Colonies of *B. impatiens* were obtained from Koppert Biological  
112 Systems (Howell Michigan, USA), maintained in the laboratory under constant darkness, a  
113 temperature of 28–30°C, 60% relative humidity, and supplied *ad libitum* with a sugar solution  
114 and fresh pollen (Light spring bee pollen, 911Honey). These colonies were used as a source of  
115 callows (newly emerged workers <24 h) and brood. In all experiments, workers (n=346) were  
116 separated from their parental colonies and placed in pairs (n=173) in small plastic cages (11 cm  
117 diameter x 7 cm height) with different combination of brood and queen as compared to controls.  
118 Active egg laying queens were taken from full-size Koppert colonies.

119 *Experiment 1 - The effects of brood and queen presence on worker reproduction.* Newly  
120 emerged workers were sampled from two parental colonies and placed in pairs for 10 days in  
121 order to allow them to fully activate their ovaries and lay eggs. Cages were randomly assigned to  
122 one of five treatments: (1) 8 pairs of workers without a queen or brood (w/o QB). Eggs that were

123 laid by these workers (typically within 8-9 days) were counted and removed daily to maintain  
124 constant absence of brood; (2) 8 pairs of workers with 10-20 young larvae (B). Clutches of 10-  
125 20 larvae encased in a thin wax envelope separated from other wax structures were placed in the  
126 cages at the onset of the experiment and allowed to develop normally. The feeding period of *B.*  
127 *impatiens* larvae lasts 9-11 days (Cnaani et al., 2002), thus all larvae turned into pupae by the end  
128 of the experiment. Eggs that were laid in these cages remained untouched and were counted by  
129 the end of the experiment; (3) 8 pairs of workers with 10-20 young larvae (as described earlier)  
130 were replaced five days after the onset of the experiment with similar amount of new young  
131 larvae (YB). In a previous study we found that only young larvae reduce worker egg laying while  
132 pupae induce the opposite effect (Starkey et al., 2019a). Therefore, this procedure ensured  
133 constant presence of young larvae throughout the experiment. Eggs that were laid in these cages  
134 remained untouched and were counted by the end of the experiment; (4) 9 pairs of workers with a  
135 queen but without brood (Q). Eggs that were laid in these cages (typically by the queen within 1-2  
136 days) were counted and removed daily to maintain constant absence of brood; (5) 9 pairs of  
137 workers with a queen and 10-20 young larvae (QB). Eggs that were laid in these cages (typically  
138 by the queen within 1-2 days) remained untouched and were counted by the end of the  
139 experiment. Diagram of the experimental design is provided in Fig 1a. All cages were kept for 10  
140 days, after which workers were frozen at -20° C until further analysis. We collected data about  
141 worker and queen egg laying and worker oocyte size.

142 ***Experiment 2 – The effects of brood and queen presence on worker aggressive and brood care***  
143 ***behaviors.*** In this experiment we tested the effects of brood and queen on worker behavior and  
144 also the effects they may have on worker behavior when perceived indirectly through a mesh.  
145 Newly emerged workers were collected from four parental colonies and housed in a rectangular  
146 cage divided in two by a mesh screen for 3 days. Previous studies show that the majority of  
147 aggression is exhibited by workers within 3 days (Amsalem and Hefetz, 2010; Padilla et al.,  
148 2016). In each compartment we placed a pair of workers that was randomly assigned to one of the  
149 following treatments: (1) direct contact with 10-20 young larvae (12 pairs); (2) indirect contact  
150 (through a mesh) with 10-20 young larvae (12 pairs); (3) direct contact with an active queen but  
151 without brood (11 pairs); (4) indirect contact with an active queen without brood (11 pairs); (5)  
152 direct contact with an active queen and 10-20 young larvae (12 pairs), and (6) indirect contact  
153 with an active queen and 10-20 young larvae (12 pairs). Diagram of the experimental design is

154 provided in Fig 1b. All the eggs found in the cages were laid by the queen. These eggs remained  
155 untouched or were counted and removed daily in compartments that were designed to remain  
156 brood-less. Observations were carried out for 20 minutes per pair per day during days 1-3.  
157 Observations were conducted daily between 12:00 to 16:00. During observations we recorded  
158 aggressive interactions between workers in each pair and interactions between adult workers and  
159 brood. Aggressive interactions included climbing (one bee mounting another bee), humming  
160 (rapid wing movements directed at another bee without a physical contact), darting (rapid  
161 movement towards another bee without a physical contact), pushing (physical contact from which  
162 the other bee retreats) and attack (overt fight with biting and stinging attempts), as described in  
163 (Amsalem and Grozinger, 2017; Amsalem and Hefetz, 2010). All these behaviors are performed  
164 in a higher rate by dominant bumble bee females, both workers and queens (Amsalem and  
165 Grozinger, 2017; Amsalem and Hefetz, 2010; Amsalem and Hefetz, 2011; Amsalem et al.,  
166 2014b; Amsalem et al., 2014c; Duchateau, 1989; Padilla et al., 2016). The sum of all aggressive  
167 behaviors that occurred during the observation period per cage was termed ‘aggression index’ and  
168 used in further analysis. Interactions with brood included feeding and incubation. The sum of all  
169 interactions with brood per cage was termed ‘brood-tending index’ and used in further analysis.  
170 Workers were sampled on the fourth day by flash freezing and kept in -20° C until further  
171 analysis.

172 ***Experiment 3 - The effect of queen and brood on worker brain gene expression pattern.*** Newly  
173 emerged workers were collected from four parental colonies and kept in pairs for 3 days to  
174 capture gene expression differences before workers activate their ovaries. Pairs of workers were  
175 randomly grouped with: (1) no brood or queen (9 pairs); (2) piece of wax (10 pairs); (3) 10-20  
176 young larvae encased in a wax envelope (9 pairs), and (4) approximately 10 pupae encased in  
177 their individual cocoons envelopes (9 pairs). In a follow up experiment, we grouped newly  
178 emerged workers with (1) no brood or a queen (w/o QB, 6 pairs); (2) 10-20 larvae (B, 6 pairs);  
179 (3) an active queen with no brood (Q, 6 pairs). Eggs laid by the queen in these cages were  
180 counted and removed daily; (4) a queen and 10-20 larvae (QB, 6 pairs). In these cages, the  
181 queen’s eggs remained in the cage and were counted by the end of the experiment. Diagrams of  
182 the experimental design are provided in Figs 1c and 1d. Workers were sampled on the fourth day  
183 by flash freezing and kept in -80° C until further analysis. We extracted RNA from worker brains

184 (pool of 2 brains from the same cage per sample) and collected data about worker oocyte size and  
185 brain gene expression.

186 *Brood and wax collection:* Larvae, pupae and wax were gently removed from their parental  
187 colonies and were used only if they remained intact during collection. Young larvae were defined  
188 by their mass (<50 mg, roughly corresponding to instars 1 and 2) as in our previous studies  
189 (Starkey et al., 2019a; Starkey et al., 2019b). All the brood and the wax were collected from  
190 queen-right colonies with no signs of worker reproduction. All the brood was likely to be of  
191 female workers, though we have previously shown that worker egg laying is similarly decreased  
192 regardless of the brood sex (Starkey et al., 2019a). In all experiments, workers were introduced to  
193 unrelated brood. In a previous study we showed that worker reproduction is similarly affected by  
194 related or unrelated brood (Starkey et al., 2019a).

195 *Egg laying:* Egg laying by queens and workers was observed daily. The cumulative number of  
196 eggs (or larvae, if eggs hatched) was counted by the end of each experiment. While egg oophagy  
197 generally exists in bumble bees, it is often performed in queen-right colonies and rarely occurs in  
198 small queen-less groups (Amsalem et al., 2015a). We did not see evidence for oophagy (such as  
199 open egg cells, etc.) that could affect the results. To account for variation in worker egg laying  
200 between colonies (Amsalem et al., 2015a; Amsalem et al., 2015b), we ensured that each  
201 experiment was replicated using several source colonies, equally representing both treatment and  
202 control groups. We statistically controlled for colony effect whenever such effect was found.

203 *Measurement of ovarian activation:* After bees were collected, each bee was placed in a separate  
204 tube and received an individual number corresponding with their cage and treatment. Thus,  
205 dissections were performed blindly. Ovaries were dissected under a stereomicroscope and placed  
206 into drops of distilled water. The length of the terminal oocyte in the three largest ovarioles was  
207 measured with a micrometer eyepiece embedded into the lens. Workers possess four ovarioles per  
208 ovary and at least one oocyte per ovary was measured. Mean terminal oocyte length for each bee  
209 was used as an index of ovarian activation (Amsalem et al., 2009)

210 *Brain dissections and RNA extraction:* Bumble bee workers were collected by flash freezing on  
211 dry ice. Heads were separated from the thorax and stored at -80°C until RNA extraction. Brains  
212 of each pair of bees were separated from the head on dry ice and pooled together. Total RNA was



213 extracted using a RNeasy kit (Qiagen) according to the manufacturer's instructions. RNA quality  
214 and quantity were analyzed using a NanoDrop One<sup>C</sup> (Thermo Scientific).

215 *Primer design and choice of genes:* Genes were identified using the NCBI/blast home page  
216 (<http://blast.ncbi.nlm.nih.gov/Blast.cgi>). Design of forward and reverse primers for each gene was  
217 performed using PrimerBLAST <https://www.ncbi.nlm.nih.gov/tools/primer-blast/>) or was taken  
218 from a previous study (Padilla et al., 2016). A list of all primers used in this study is provided in  
219 Table S1. Four genes have been selected based on previous studies showing that they are  
220 regulated in bumble bees in association with reproduction, aggressive behavior or both: (1)  
221 *Vitellogenin (vg)* is the major egg yolk protein female insects invest in the ovaries (Hagedorn and  
222 Kunkel, 1979). Vg was upregulated in aggressive and fertile workers (vs. subordinate and sterile)  
223 and queens (vs. workers) of *B. terrestris* fat-body and heads (Amsalem et al., 2014b), and  
224 downregulated in the presence of the queen in *B. impatiens* heads (vs. her absence) (Padilla et al.,  
225 2016). Brain *vg* levels were shown to differentially expressed in *B. terrestris* as function of sex,  
226 caste and reproduction (Jedlicka et al., 2016b); (2) *Kruppel homolog 1 (krh1)* is a transcription  
227 factor upstream to the juvenile hormone (JH) synthesis and was upregulated in dominant *B.*  
228 *terrestris* workers (vs. subordinates) and in the absence of the queen (vs. its presence) (Shpigler et  
229 al., 2010), but did not decrease in workers in the presence of the queen in *B. impatiens* (Padilla et  
230 al., 2016) and was upregulated in both diapausing queen and males of *B. terrestris* (Jedlicka et al.,  
231 2016a) ; (3) *Methyl farneosoate epoxidase (mfe)* encodes to the final enzyme in the synthesis of  
232 JH and was downregulated in non-reproductive *B. terrestris* queens (vs. reproductives) (Jedlicka  
233 et al., 2016a); (4) *DNA methyltransferase 3 (dnmt3)* encodes to the DNA methyltransferase  
234 enzyme that is essential for creating de novo DNA methylation marks on the genome and was  
235 upregulated in older *B. terrestris* workers (vs. younger) (Lockett et al., 2016). It was also  
236 associated with reproductive castes in the honeybee (Kucharski et al., 2008). However a recent  
237 study found no evidence for methylation directly affecting gene expression between reproductive  
238 and sterile workers in *B. terrestris* (Marshall et al., 2019).

239 *Gene expression analysis:* Synthesis of cDNA (Applied Biosystems™) was performed according  
240 to the manufacturer's instructions using 200 ng of RNA. Two µl of diluted cDNA were combined  
241 with 5µL SYBR-Green Master mix (Bioline, Luckenwalde, Germany), 0.2 µl of each forward and  
242 reverse primer (10 µM stock) and 4.6 µl DEPC-water. Two housekeeping genes were used to  
243 control for PCR efficiency: Arginine kinase and Phospholipase A2. These genes were found to be

244 stable in *B. impatiens* brains and were used in several of our previous studies (Amsalem and  
245 Grozinger, 2017; Padilla et al., 2016). Expression levels were determined using qRT-PCR on a  
246 QuantStudio 5. Negative control samples (cDNA reaction without RT enzyme) and a water  
247 control were also present on each plate. PCR product quality and specificity were verified using  
248 melt curve analysis. Triplicate reactions were performed for each of the samples and averaged for  
249 use in statistical analysis. Expression levels of candidate genes were normalized to the geometric  
250 mean of two housekeeping genes using the  $2^{-\Delta\Delta C_t}$  technique.

251 *Statistics.* Statistical analyses were performed using SPSS v.21. Generalized Estimating  
252 Equations analysis (hence GEE) was employed for all comparisons. The models were built to  
253 control for interdependencies within data using parental colony and cage as subject variables.  
254 Worker ID and direct/indirect contact were used as a within-subject variables for oocyte size and  
255 behavior analyses respectively. Poisson loglinear distribution was used for egg laying analysis.  
256 Unstructured correlation matrix was used in models for egg-laying, oocyte size and behavior  
257 analysis. Exchangeable correlation matrix was used in models for gene expression analysis.  
258 Robust estimation was used to handle violations of model assumptions. All analyses used  
259 treatment as the main effect and were followed by post-hoc contrast estimation using Least  
260 Significant Difference (LSD) method. Non-parametric Spearman's rho was used for correlation  
261 analyses. For genes that were significantly correlated with oocyte size, the latter parameter was  
262 used as a covariate in the GEE model analysis to control for its effect. Data are presented as  
263 boxplots featuring the minimum and maximum values, outliers and medians (egg laying, oocyte  
264 size, and aggressive behavior), or as means  $\pm$  S.E.M. (gene expression). Statistical significance  
265 was accepted at  $\alpha=0.05$ .

## 266 **Results**

267 *Experiment 1- The effects of brood and queen presence on worker reproduction.* Worker egg  
268 laying was the highest in the absence of queen or brood (w/o QB), significantly reduced in the  
269 presence of larvae that developed into pupae throughout the course of the experiment (B) and  
270 further reduced in the continuous presence of young larvae (YB). In both queen groups (Q, QB),  
271 no egg laying by workers was observed, regardless of the presence of brood (GEE, Wald  $\chi^2=$   
272 33.63,  $p<0.001$  for treatment, significant post-hoc contrasts indicated by different letters in Fig.  
273 2a).

274 We further examined the effect of the treatment on worker oocyte size. The three queen-less  
275 groups did not differ in oocyte size with all workers exhibiting fully activated ovaries. However,  
276 worker oocyte size was significantly reduced in the presence of the queen and even more so in the  
277 presence of the queen with brood (GEE, Wald  $\chi^2_4 = 58.45$ ,  $p < 0.001$  for treatment, significant post-  
278 hoc contrasts indicated by different letters in Fig. 2b).

279 ***Experiment 2 – The effects of brood and queen presence on worker aggressive and brood care***  
280 ***behaviors.*** Aggressive interactions between workers (see Methods) were counted for 20 minutes  
281 per day for three days and summed together for each cage. Levels of aggression between workers  
282 differed significantly across treatments and exposure types (direct/indirect) but the interaction  
283 between the two factors was not significant (GEE, Wald  $\chi^2_2 = 10.97$ ,  $p = 0.004$  for treatment, Wald  
284  $\chi^2_1 = 18.95$ ,  $p < 0.001$  for exposure type, Wald  $\chi^2_2 = 3.81$ ,  $p = 0.149$  for interaction; Fig. 3).

285 Worker aggression levels were significantly reduced only in the direct presence of the queen and  
286 even more so in the direct presence of the queen and the brood (post-hoc LSD,  $p = 0.002$  for queen  
287 and brood vs. brood alone,  $p = 0.556$  for brood alone vs. queen alone and  $p = 0.013$  for queen +  
288 brood vs. queen alone). The aggression levels of workers in the presence of the brood were  
289 intermediate compared to the queen-right groups and the controls (post-hoc LSD,  $p = 0.087$  for  
290 direct vs. indirect exposure to brood,  $p = 0.556$  for direct exposure to brood vs. queen).

291 Brood tending behaviors (the number of feeding and incubating events workers performed) were  
292 observed and counted in cages with direct exposure to brood and queen as compared to cages  
293 with only brood (i.e., the only cages where brood was present). The total number of brood-  
294 tending behaviors was greater in cages with queen and brood compared to cages with only brood  
295 ( $24 \pm 2.53$  and  $35.25 \pm 6.6$  respectively, GEE, Wald  $\chi^2_1 = 11.69$ ,  $p = 0.001$ ). However, brood tending  
296 behaviors per capita (i.e., divided by the number of bees tending the brood in each cage, since  
297 together with the queen, queen-right cages included three females compared to only two in the  
298 queen-less cages) did not significantly differ between the queen-right and the queen-less groups  
299 ( $4.2 \pm 1.26$  and  $7.62 \pm 2.2$  respectively, GEE, Wald  $\chi^2_1 = 0.107$ ,  $p = 0.743$ ).

300 ***Experiment 3 - The effect of brood type, and queen and brood on worker brain gene expression***  
301 ***pattern.*** In the first experiment we kept pairs of newly emerged workers for 3 days with no brood,  
302 piece of wax, 10 pupae or 10-20 young larvae. At the time of sampling all these workers had

303 inactive ovaries ( $0.22 \pm 0.01$  mm,  $n=74$ ). However, oocyte size significantly correlated with *krh1*  
304 expression levels (Spearman's  $\rho=0.38$ ,  $p=0.021$ ) and therefore was included in the analysis as  
305 covariate.

306 *Vg* and *mfe* expression levels differed significantly across treatments (GEE, Wald  $\chi^2_3 = 20.04$ ,  
307  $p < 0.001$  and GEE, Wald  $\chi^2_3 = 12.02$ ,  $p=0.007$  respectively). *Vg* levels were significantly lower in  
308 pairs exposed to larvae compared with pairs kept without brood or wax (post-hoc LSD contrast,  
309  $p=0.003$  and  $p < 0.001$  respectively). *Mfe* levels were significantly lower in pairs exposed to larvae  
310 and pupae compared to pairs housed without brood (post-hoc LSD contrast,  $p=0.04$  for both  
311 comparisons; Fig. 4). Expression levels of *krh1* did not differ significantly across treatments but  
312 covaried significantly with oocyte size (GEE, Wald  $\chi^2_3 = 0.11$ ,  $p=0.99$  and GEE, Wald  $\chi^2_1 =$   
313  $4.182$ ,  $p=0.041$  respectively). *Dnmt3* expression also did not differ significantly across treatments  
314 (GEE, Wald  $\chi^2_3 = 5.06$ ,  $p=0.168$ ; Fig. 4).

315 In the second experiment, we examined the effect of brood and queen presence on workers brain  
316 gene expression. Here too, workers were 3 days old at the time of sampling and all workers had  
317 inactive ovaries ( $0.2 \pm 0.01$  mm on average,  $n=48$  workers). However, oocyte size correlated  
318 significantly with *vg* expression (Spearman's  $\rho=0.53$ ,  $p=0.007$ ). When *vg* expression was  
319 compared across treatments with oocyte size as a covariate, the difference between treatments  
320 was significant but the covariance with oocyte size was not (GEE, Wald  $\chi^2_3 = 16.83$ ,  $p < 0.001$  and  
321 GEE, Wald  $\chi^2_1 = 3.01$ ,  $p=0.08$  respectively). Post-hoc comparisons revealed that pairs kept with  
322 brood, without brood and queen and in queen-right treatments (with or without brood) all differed  
323 significantly (post-hoc LSD,  $p < 0.004$  for all comparisons), but the queen-right treatments were  
324 similar (post-hoc LSD,  $p=0.67$ ). *Mfe* expression levels also differed significantly across  
325 treatments (GEE, Wald  $\chi^2_2 = 39.78$ ,  $p < 0.001$ ) with pairs without queen and brood displaying  
326 higher expression levels compared to all other treatments, but the later three were similar to one  
327 another (post-hoc LSD,  $p < 0.001$  for control vs. all other treatments,  $p > 0.3$  for all other  
328 comparisons; Fig. 4). *Krh1* and *dnmt3* expression also differed across treatments (GEE, Wald  $\chi^2_2$   
329  $= 15.42$ ,  $p < 0.001$  and GEE, Wald  $\chi^2_2 = 12.234$ ,  $p=0.002$  respectively; Fig. 4). *Krh1* levels were  
330 highest in control groups and lowest in workers grouped with queen and brood, while with brood  
331 alone or queen alone the levels were intermediate. *Dnmt3* levels were highest in control groups

332 and lowest in groups with brood alone, while queen-right treatments showed intermediate  
333 expression.

334

### 335 **Discussion**

336 Our results offer meaningful insights into the effects of the queen and the brood on *B. impatiens*  
337 worker reproduction. We show that while the effect induced by the queen was always stronger  
338 than the brood, brood on its own or with the queen exerts a meaningful effect on worker  
339 reproduction and that this effect is manifested at multiple levels – from altering expression of  
340 genes in worker brain to decreasing egg-laying and aggressive behaviors. We have identified  
341 three different interactions between the brood and the queen roles in our data (Table 1): (1)  
342 **synergistic effects**: neither the queen nor the brood alone were able to induce the full effect in  
343 workers but the combined effect of the brood and the queen was stronger than each of the effects  
344 alone; (2) **additive effects**: the combined effects of the queen and the brood are the gross sum of  
345 their separated effect. In these interactions brood acted in a manner similar to the queen but to a  
346 much smaller extent and improved the quality of the effect induced by the queen; and (3)  
347 **redundant effects**: the brood effect was equal to the effect induced by the queen, and either the  
348 brood or the queen were able to induce the same effect in workers.

349 In a few cases we found that the queen and the brood acted on worker reproduction in synergy.  
350 The combined effect of the brood and the queen was larger than each of the effects separately.  
351 For example, while the brood did not decrease worker ovary activation and the queen alone only  
352 partially decreased it, the combined presence of the queen and the brood fully inhibited ovary  
353 activation (Fig. 2b). Similarly, *krh1* levels were more affected by the combined presence of the  
354 brood and the queen than by each of them alone (Fig. 4). The synergetic interactions in our study  
355 induced physiological changes (ie, ovary activation or *krh1* levels that correlate with oocyte size).  
356 This may suggest that costly physiological changes (e.g. workers refraining from activating their  
357 ovaries), have a higher threshold for signals to take effect. This could explain why bumble bee  
358 worker ovaries are inactive only in young, full-sized colonies (Duchateau and Velthuis, 1988)  
359 where both the queen and young brood are present.

360 Results obtained in experiments examining egg laying, aggressive behavior and *vg* expression  
361 levels indicate that some of the effects of the queen and the brood are additive. The brood acted in  
362 a manner similar to the queen but to a much smaller extent. For example, while brood caused a  
363 two-fold reduction in the *vg* expression, the queen caused a ten-fold reduction in the same  
364 transcript (Fig. 4), and while brood significantly reduced worker egg laying, the queen inhibited it  
365 completely (Fig. 2a). The additive interactions in our study were typical to behavioral changes  
366 that are reversible and thus have a lower threshold for signals to cause a change, resulting in  
367 workers responding to either the presence of the queen or the brood, as well as to both. Indeed,  
368 not only egg laying and aggression reside under the strict definition of a behavioral change, but  
369 also the expression levels of *vg*. While *vg*, a gene typically encoding to the yolk protein invested  
370 in female ovaries, is regulated by JH in most insects, it was suggested to decouple from JH in the  
371 transition to advanced eusociality and to regulate aggressive behavior in *B. terrestris* (Amsalem et  
372 al., 2014b), *B. impatiens* (Padilla et al., 2016) and Themnothorax ants (Kohlmeier et al., 2019;  
373 Kohlmeier et al., 2018). In the latter, *vg* was duplicated and its ortholog was associated with  
374 behavioral maturation.

375 In certain cases, the effects of the queen and brood were redundant. This type of interaction is  
376 truly puzzling since it questions the need of either the queen or the brood for exerting the full  
377 effect. Both queen and brood acted similarly either separately or when combined, as in the case of  
378 *mfe* and *dnmt3* expression levels that were equally downregulated in the presence of the queen,  
379 the brood, or both (Fig. 4). Levels of *mfe* expression were reduced to the same extent -- twofold  
380 in this case -- by the queen and the brood and the combination of the queen and the brood did not  
381 act any stronger than each of them separately. Furthermore, the brood alone produced a larger  
382 effect on the expression levels of *dnmt3* than the queen and the brood together. This suggests that  
383 both the queen and the brood probably use the same regulatory lever to affect certain genes, and  
384 each of them can exploit the full capacity of that regulatory mechanism. However, both in the  
385 case of *mfe* and *dnmt3*, the effects, even though statistically significant, were minor (ca. 1.2-2 fold  
386 change) and it is unclear to what extent the queen or the brood utilize these pathways to regulate  
387 worker reproduction, and what the underlying mechanism might be. .

388 Our findings on gene expression pattern in response to the queen and the brood contrast previous  
389 studies on the honeybee in which both queen and brood pheromones affect worker ovary  
390 activation (Mohammedi et al., 1998; Traynor et al., 2014), but no common pattern was observed

391 for the effects of brood pheromone and queen pheromone on worker brain gene expression  
392 (Alaux et al., 2009; Grozinger et al., 2003). Previous gene expression studies showed that in the  
393 honey bee, *vg* expression is elevated, rather than reduced, following exposure to the queen  
394 pheromone, QMP (Fischer and Grozinger, 2008), in line with its role in regulating division of  
395 labor in the honeybee, as opposed to regulating reproduction in most other insects. However, the  
396 titers of *vitellogenin* protein are reduced in brood tending workers (Amdam et al., 2009; Eyer et  
397 al., 2017; Smedal et al., 2009). It further showed that *krh1* levels were reduced following  
398 exposure to QMP and were higher in nurses than in foragers (Grozinger and Robinson, 2007), but  
399 the precise effect of brood pheromone on honeybee *krh1* expression is still unknown, and *mfe*  
400 levels in the honeybee seem to be largely unaffected by exposure to brood (Eyer et al., 2017).  
401 Curiously, whole-body levels extracts showed higher *mfe* expression in nurses than in foragers,  
402 while in isolated *corpora allata* the opposite was true (Bomtorin et al., 2014; Corona et al., 2019).  
403 In our study, however, all of these genes were affected by both the queen and the brood in the  
404 same way though to a different extent. This discrepancy suggests that the honey bee, a more  
405 derived species, features a larger and more diverse repertoire of regulatory mechanisms than the  
406 more primitive species where effects of different social factors use the same focal regulatory  
407 levers. The idea that social evolution is characterized with evolutionary diversification of  
408 regulatory pathways was proposed for species rather far from one another on the tree of life (e.g.  
409 *drosophila* vs. honeybees) (Robinson and Ben-Shahar, 2002; Toth et al., 2010). Comparison of  
410 closely related species exhibiting different eusocial organizations (i.e. bees) would clarify  
411 whether the repertoire of regulatory mechanisms has expanded in species exhibiting a stronger  
412 reproductive skew.

413 Our finding that both queen and brood can reduce worker egg-laying, but only queens  
414 significantly affect ovary activation, suggests that these two reproductive processes are separately  
415 regulated by different physiological and neural pathways. Previous studies in solitary insects  
416 demonstrated that oviposition was controlled by distinct neural structures different from those  
417 that regulated ovary development, and while the former is more likely under direct innervation  
418 control, the latter is subject to neuroendocrine regulation (Meola and Lea, 1972; Mouton, 1971;  
419 Thomas and Mesnier, 1973). However, separate mechanisms regulating these processes have not  
420 been studied in detail in social insects. Our study highlights the importance of distinguishing  
421 between different aspects of reproduction and regulatory mechanisms behind each of them. Ovary

422 activation is a long-term physiological process involving metabolic activity and accompanied by  
423 a number of large-scale changes in an organism. Egg-laying, however, is a behavioral  
424 phenomenon under CNS control. The fact that brood on its own was capable of affecting egg  
425 laying and aggressive behavior but not ovary activation suggests that the effect of brood is limited  
426 to behavioral processes but probably does not encompass other pathways regulating ovary  
427 activation which the queen can exert influence.

428 Overall our study sheds light on the synergetic and additive mechanisms of reproductive  
429 regulation and maintenance of social harmony in insect societies beyond queen semiochemicals  
430 and paves the way to further studies of multiple interacting factors involved in regulating worker  
431 reproduction. However, future research is required to understand other factors at play in this  
432 system, that remained unexplored in the current study. These include the specific molecular  
433 pathways through which the queen and the brood act and the extent to which the queen herself  
434 might be influenced by her brood. We hope that our study will blaze the trail for in-depth research  
435 of those questions.

436

#### 437 **Acknowledgments**

438 We thank members of the Amsalem Lab for helpful discussions and critical reading of earlier  
439 drafts of the manuscript and two anonymous reviewers whose comments have greatly improved  
440 this manuscript.



441 Captions to figures

442 Fig. 1: Diagrams of the experimental design of experiments 1-3

443 Fig. 2: Number of worker-laid eggs (a) and oocyte size (b) across different treatments. Box plots  
444 display medians, quartiles and minimum and maximum values. Dots above/below each box  
445 indicate outliers. Statistical differences are reflected by different letters above boxes. Sample size  
446 is indicated within boxes.

447 Fig. 3: Number of aggressive interactions across different treatments with direct contact (light  
448 boxes) and indirect contact (dark boxes) with brood, queen or both. Box plots display medians,  
449 quartiles and minimum and maximum values. Dots above/below each box indicate outliers.  
450 Statistical differences are reflected by different letters above boxes. Sample size is indicated  
451 within boxes.

452 Fig. 4: Gene expression levels across treatments with different brood types (a) and combinations  
453 of queen and brood exposure (b). Expression levels are displayed as fold changes relative to  
454 larvae treatment (a) and QB treatment (b). Bars represent mean fold change with error bars  
455 calculated from minimum and maximum Ct difference. Statistical differences are reflected by  
456 different letters within bars. Sample sizes for each treatment are indicated in parentheses.

457

- 459 **Alaux, C., Le Conte, Y., Adams, H. A., Rodriguez-Zas, S., Grozinger, C. M.,**  
460 **Sinha, S. and Robinson, G. E.** (2009). Regulation of brain gene expression in honey  
461 bees by brood pheromone. *Genes, Brain and Behavior* **8**, 309-319.
- 462 **Alaux, C., Savarit, F., Jaisson, P. and Hefetz, A.** (2004). Does the queen win it  
463 all? Queen-worker conflict over male production in the bumblebee, *Bombus terrestris*.  
464 *Naturwissenschaften* **91**, 400-3.
- 465 **Amdam, G. V., Rueppell, O., Fondrk, M. K., Page, R. E. and Nelson, C. M.**  
466 (2009). The nurse's load: Early-life exposure to brood-rearing affects behavior and  
467 lifespan in honey bees (*Apis mellifera*). *Experimental gerontology* **44**, 467-471.
- 468 **Amsalem, E. and Grozinger, C. M.** (2017). Evaluating the molecular,  
469 physiological and behavioral impacts of CO2 narcosis in bumble bees (*Bombus*  
470 *impatiens*). *Journal of Insect Physiology* **101**, 57-65.
- 471 **Amsalem, E., Grozinger, C. M., Padilla, M. and Hefetz, A.** (2015a). The  
472 physiological and genomic bases of bumble bee social behaviour. In *Genomics,*  
473 *Physiology and Behaviour of Social Insects*, vol. 48 eds. Z. Amro and F. K. Clement), pp.  
474 37-93. Adv In Insect Phys: Academic Press.
- 475 **Amsalem, E. and Hefetz, A.** (2010). The appeasement effect of sterility signaling  
476 in dominance contests among *Bombus terrestris* workers. *Behavioral ecology and*  
477 *sociobiology* **64**, 1685-1694.
- 478 **Amsalem, E. and Hefetz, A.** (2011). The effect of group size on the interplay  
479 between dominance and reproduction in *Bombus terrestris*. *PLOS ONE* **6**, e18238.
- 480 **Amsalem, E., Kiefer, J., Schulz, S. and Hefetz, A.** (2014a). The effect of caste  
481 and reproductive state on the chemistry of the cephalic labial glands secretion of *Bombus*  
482 *terrestris*. *Journal of Chemical Ecology* **40**, 900-12.
- 483 **Amsalem, E., Malka, O., Grozinger, C. and Hefetz, A.** (2014b). Exploring the  
484 role of juvenile hormone and vitellogenin in reproduction and social behavior in bumble  
485 bees. *BMC Evol Biol* **14**, 45.
- 486 **Amsalem, E., Orlova, M. and Grozinger, C. M.** (2015b). A conserved class of  
487 queen pheromones? Re-evaluating the evidence in bumblebees (*Bombus impatiens*).  
488 *Proceedings of the Royal Society B: Biological Sciences* **282**, 20151800.
- 489 **Amsalem, E., Padilla, M., Schreiber, P. M., Altman, N. S., Hefetz, A. and**  
490 **Grozinger, C. M.** (2017). Do bumble bee, *Bombus impatiens*, queens signal their  
491 reproductive and mating status to their workers? *Journal of Chemical Ecology* **43**, 563-  
492 572.
- 493 **Amsalem, E., Teal, P., Grozinger, C. M. and Hefetz, A.** (2014c). Precocene-I  
494 inhibits juvenile hormone biosynthesis, ovarian activation, aggression and alters sterility  
495 signal production in bumble bee (*Bombus terrestris*) workers. *Journal of Experimental*  
496 *Biology* **217**, 3178-85.
- 497 **Amsalem, E., Twele, R., Francke, W. and Hefetz, A.** (2009). Reproductive  
498 competition in the bumble-bee *Bombus terrestris*: do workers advertise sterility?  
499 *Proceedings of the Royal Society B: Biological Sciences* **276**, 1295-304.

- 500 **Bomtorin, A. D., Mackert, A., Rosa, G. C., Moda, L. M., Martins, J. R.,**  
501 **Bitondi, M. M., Hartfelder, K. and Simoes, Z. L.** (2014). Juvenile hormone  
502 biosynthesis gene expression in the corpora allata of honey bee (*Apis mellifera* L.) female  
503 castes. *PLOS ONE* **9**, e86923.
- 504 **Calisi, R., Geraghty, A., Avila, A., Kaufer, D., Bentley, G. and Wingfield, J.**  
505 (2016). Patterns of hypothalamic GnIH change over the reproductive period in starlings  
506 and rats. *Journal of General and Comparative Endocrinology* **237**, 140-146.
- 507 **Cnaani, J., Schmid-Hempel, R. and Schmidt, J. O.** (2002). Colony  
508 development, larval development and worker reproduction in *Bombus impatiens* Cresson.  
509 *Insectes Sociaux* **49**, 164-170.
- 510 **Corona, M., Branchiccela, B., Madella, S., Chen, Y. and Evans, J. D.** (2019).  
511 Decoupling the effects of nutrition, age and behavioral caste on honey bee physiology  
512 and immunity. *BioRxiv*, 667931.
- 513 **Duchateau, M. J.** (1989). Agonistic Behaviors in Colonies of the Bumblebee  
514 *Bombus-Terrestris*. *Journal of Ethology* **7**, 141-151.
- 515 **Duchateau, M. J. and Velthuis, H. H. W.** (1988). Development and  
516 reproductive strategies in *Bombus terrestris* colonies. *Behavior* **107**, 186-207.
- 517 **Ebie, J. D., Holldobler, B. and Liebig, J.** (2015). Larval regulation of worker  
518 reproduction in the polydomous ant *Novomessor cockerelli*. *Naturwissenschaften* **102**, 72.
- 519 **Eyer, M., Dainat, B., Neumann, P. and Dietemann, V.** (2017). Social  
520 regulation of ageing by young workers in the honey bee, *Apis mellifera*. *Experimental*  
521 *gerontology* **87**, 84-91.
- 522 **Fischer, P. and Grozinger, C. M.** (2008). Pheromonal regulation of starvation  
523 resistance in honey bee workers (*Apis mellifera*). *Naturwissenschaften* **95**, 723-9.
- 524 **Grozinger, C. M. and Robinson, G. E.** (2007). Endocrine Modulation of a  
525 Pheromone-Responsive Gene in the Honey Bee Brain. *Journal of Comparative*  
526 *Physiology a-Neuroethology Sensory Neural and Behavioral Physiology* **193**, 461-470.
- 527 **Grozinger, C. M., Sharabash, N. M., Whitfield, C. W. and Robinson, G. E.**  
528 (2003). Pheromone-Mediated Gene Expression in the Honey Bee Brain. *Proceedings of*  
529 *the National Academy of Sciences of the United States of America* **100**, 14519-14525.
- 530 **Hagedorn, H. H. and Kunkel, J. G.** (1979). Vitellogenin and Vitellin in Insects.  
531 *Annual Review of Entomology* **24**, 475-505.
- 532 **Hefetz, A.** (2019). The critical role of primer pheromones in maintaining insect  
533 sociality. In *Zeitschrift fur Naturforschung C*, vol. 0.
- 534 **Jedlicka, P., Ernst, U. R., Votavova, A., Hanus, R. and Valterova, I.** (2016a).  
535 Gene Expression Dynamics in Major Endocrine Regulatory Pathways along the  
536 Transition from Solitary to Social Life in a Bumblebee, *Bombus terrestris*. *Frontiers in*  
537 *Physiology* **7**, 574.
- 538 **Jedlicka, P., Ernst, U. R., Votavova, A., Hanus, R. and Valterova, I.** (2016b).  
539 Gene Expression Dynamics in Major Endocrine Regulatory Pathways along the  
540 Transition from Solitary to Social Life in a Bumblebee, *Bombus terrestris*. *Front Physiol*  
541 **7**, 574.
- 542 **Keller, L. and Nonacs, P.** (1993). The role of queen pheromones in social  
543 insects: queen control or queen signal? *Animal Behaviour* **45**, 787-794.

- 544 **Kocher, S. D. and Grozinger, C. M.** (2011). Cooperation, conflict, and the  
545 evolution of queen pheromones. *Journal of Chemical Ecology* **37**, 1263-75.
- 546 **Kohlmeier, P., Alleman, A. R., Libbrecht, R., Foitzik, S. and Feldmeyer, B.**  
547 (2019). Gene expression is more strongly associated with behavioural specialization than  
548 with age or fertility in ant workers. *Molecular Ecology* **28**, 658-670.
- 549 **Kohlmeier, P., Feldmeyer, B. and Foitzik, S.** (2018). Vitellogenin-like A-  
550 associated shifts in social cue responsiveness regulate behavioral task specialization in an  
551 ant. *PLoS biology* **16**, e2005747.
- 552 **Kucharski, R., Maleszka, J., Foret, S. and Maleszka, R.** (2008). Nutritional  
553 control of reproductive status in honeybees via DNA methylation. *Science* **319**, 1827-30.
- 554 **Le Conte, Y. and Hefetz, A.** (2008). Primer pheromones in social hymenoptera.  
555 *Annual Review of Entomology* **53**, 523-542.
- 556 **Lockett, G. A., Almond, E. J., Huggins, T. J., Parker, J. D. and Bourke, A. F.**  
557 (2016). Gene expression differences in relation to age and social environment in queen  
558 and worker bumble bees. *Experimental gerontology* **77**, 52-61.
- 559 **Maisonnasse, A., Lenoir, J. C., Beslay, D., Crauser, D. and Le Conte, Y.**  
560 (2010). E-beta-Ocimene, a Volatile Brood Pheromone Involved in Social Regulation in  
561 the Honey Bee Colony (*Apis mellifera*). *PLOS one* **5**.
- 562 **Maisonnasse, A., Lenoir, J. C., Costagliola, G., Beslay, D., Choteau, F.,**  
563 **Crauser, D., Becard, J. M., Plettner, E. and Le Conte, Y.** (2009). A scientific note on  
564 E-beta-ocimene, a new volatile primer pheromone that inhibits worker ovary  
565 development in honey bees. *Apidologie* **40**, 562-564.
- 566 **Marshall, H., Lonsdale, Z. N. and Mallon, E. B.** (2019). Methylation and Gene  
567 Expression Differences Between Reproductive Castes of Bumblebee Workers. *bioRxiv*,  
568 517698.
- 569 **Meola, R. and Lea, A. O.** (1972). Humoral inhibition of egg development in  
570 mosquitoes. *Journal of medical entomology* **9**, 99-103.
- 571 **Michener, C. D.** (1974). The social behavior of the bees. Cambridge,  
572 Massachusetts: Harvard University Press.
- 573 **Mohammedi, A., Paris, A., Crauser, D. and Le Conte, Y.** (1998). Effect of  
574 aliphatic esters on ovary development of queenless bees (*Apis mellifera* L.).  
575 *Naturwissenschaften* **85**, 455-458.
- 576 **Mouton, J.** (1971). Influence of Neurosecretion on Reproduction of Stick Insect  
577 *Carausius morosus* (Cheleutoptera). In *Annales d'Endocrinologie*, vol. 32, pp. 709-&:  
578 Masson Editeur 120 Blvd St-Germain, 75280 Paris 06, France.
- 579 **Padilla, M., Amsalem, E., Altman, N., Hefetz, A. and Grozinger, C. M.**  
580 (2016). Chemical communication is not sufficient to explain reproductive inhibition in  
581 the bumblebee *Bombus impatiens*. *Royal Society Open Science* **3**, 160576.
- 582 **Robinson, G. E. and Ben-Shahar, Y.** (2002). Social behavior and comparative  
583 genomics: new genes or new gene regulation? *Genes, Brain and Behavior* **1**, 197-203.
- 584 **Ronai, I., Vergoz, V. and Oldroyd, B.** (2016). The mechanistic, genetic, and  
585 evolutionary basis of worker sterility in the social Hymenoptera. *Advanced Studies of*  
586 *Behavior* **48**, 251-317.

- 587 **Rottler-Hoermann, A. M., Schulz, S. and Ayasse, M.** (2016). Nest wax triggers  
588 worker reproduction in the bumblebee *Bombus terrestris*. *R Soc Open Sci* **3**, 150599.
- 589 **Rottler, A. M., Schulz, S. and Ayasse, M.** (2013). Wax lipids signal nest identity  
590 in bumblebee colonies. *Journal of Chemical Ecology* **39**, 67-75.
- 591 **Schultner, E., Oettler, J. and Helantera, H.** (2017). The role of brood in  
592 eusocial Hymenoptera. *The Quarterly Review of Biology* **92**, 39-78.
- 593 **Shpigler, H., Patch, H. M., Cohen, M., Fan, Y., Grozinger, C. M. and Bloch,**  
594 **G.** (2010). The transcription factor *Kruppel homolog 1* is linked to hormone mediated  
595 social organization in bees. *BMC evolutionary biology* **10**, 120.
- 596 **Smedal, B., Brynem, M., Kreibich, C. and Amdam, G.** (2009). Brood  
597 pheromone suppresses physiology of extreme longevity in honeybees (*Apis mellifera*).  
598 *Journal of Experimental Biology* **212**, 3795-3801.
- 599 **Smith, A. A. and Liebig, J.** (2017). The evolution of cuticular fertility signals in  
600 eusocial insects. *Current Opinions in Insect Science* **22**, 79-84.
- 601 **Sramkova, A., Schulz, C., Twele, R., Francke, W. and Ayasse, M.** (2008).  
602 Fertility signals in the bumblebee *Bombus terrestris* (Hymenoptera: Apidae).  
603 *Naturwissenschaften* **95**, 515-22.
- 604 **Starkey, J., Brown, A. and Amsalem, E.** (2019a). The road to sociality: brood  
605 regulation of worker reproduction in the simple eusocial bee *Bombus impatiens*. *Animal*  
606 *Behaviour* **154**, 57-65.
- 607 **Starkey, J., Derstine, N. and Amsalem, E.** (2019b). Do bumble bees produce  
608 brood pheromone? . *Journal of Chemical Ecology*.
- 609 **Thomas, A. and Mesnier, M.** (1973). Le rôle du système nerveux central sur les  
610 mécanismes de l'oviposition chez *Carausius morosus* et *Clitumnus extradentatus*.  
611 *Journal of Insect Physiology* **19**, 383-396.
- 612 **Toth, A. L., Varala, K., Henshaw, M. T., Rodriguez-Zas, S. L., Hudson, M. E.**  
613 **and Robinson, G. E.** (2010). Brain transcriptomic analysis in paper wasps identifies  
614 genes associated with behaviour across social insect lineages. *Proceedings of the Royal*  
615 *Society B: Biological Sciences* **277**, 2139-2148.
- 616 **Traynor, K. S., Le Conte, Y. and Page, R. E.** (2014). Queen and young larval  
617 pheromones impact nursing and reproductive physiology of honey bee (*Apis mellifera*)  
618 workers. *Behavioral Ecology and Sociobiology*  
619 **68**, 2059-2073.
- 620 **Trivers, R. L.** (1972). Parental investment and sexual selection: Biological  
621 Laboratories, Harvard University Cambridge, MA.
- 622 **Ulrich, Y., Burns, D., Libbrecht, R. and Kronauer, D. J.** (2016a). Ant larvae  
623 regulate worker foraging behavior and ovarian activity in a dose-dependent manner.  
624 *Behavioral Ecology and Sociobiology* **70**, 1011-1018.
- 625 **Ulrich, Y., Burns, D., Libbrecht, R., Kronauer, D. J. and sociobiology.**  
626 (2016b). Ant larvae regulate worker foraging behavior and ovarian activity in a dose-  
627 dependent manner. *Behavioral Ecology* **70**, 1011-1018.
- 628 **Van Oystaeyen, A., Oliveira, R. C., Holman, L., van Zweden, J. S., Romero,**  
629 **C., Oi, C. A., d'Ettorre, P., Khalesi, M., Billen, J., Wackers, F. et al.** (2014).

630 Conserved class of queen pheromones stops social insect workers from reproducing.  
631 *Science* **343**, 287-90.  
632 **Villalta, I., Abril, S., Cerda, X. and Boulay, R.** (2018). Queen Control or Queen  
633 Signal in Ants: What Remains of the Controversy 25 Years After Keller and Nonacs'  
634 Seminal Paper? *Journal of Chemical Ecology* **44**, 805-817.  
635 **Weir, B. J. and Rowlands, I.** (1973). Reproductive strategies of mammals.  
636 *Annual Review of Ecology* **4**, 139-163.  
637 **Wenseleers, T., Helanterä, H., Hart, A. and Ratnieks, F. L. W.** (2004). Worker  
638 Reproduction and Policing in Insect Societies: an Ess Analysis. *Journal of Evolutionary*  
639 *Biology* **17**, 1035-1047.  
640 **Wilson, E. O.** (1971). The insect societies. Cambridge, Massachusetts: Belknap  
641 Press of Harvard University press.  
642

643

644 Table 1. The regulatory interactions of the queen and the brood on worker reproduction in *B.*  
645 *impatiens*

| <b>TYPE OF INTERACTION</b> | <b>PATTERN</b> | <b>EXAMPLES</b>                              | <b>REDUNDANCY</b>                                   | <b>SHARED THEME</b>      |
|----------------------------|----------------|----------------------------------------------|-----------------------------------------------------|--------------------------|
| <b>SYNERGISTIC</b>         | QB>Q, Q>B      | Oocyte size                                  | No redundancy                                       | Regulation of physiology |
|                            | QB>Q, Q=B      | <i>krh1</i> levels                           |                                                     |                          |
| <b>ADDITIVE</b>            | QB=Q, Q>B      | <i>vg</i> levels<br>Egg laying<br>Aggression | B is redundant to Q, but<br>Q is not redundant to B | Regulation of behavior   |
|                            | QB=Q=B         | <i>mfe</i> levels<br><i>dnmt3</i> levels     | Q and B redundant                                   | Unknown                  |

646  
647  
648

649 Fig. 1A. Diagram of the experimental design of experiment 1

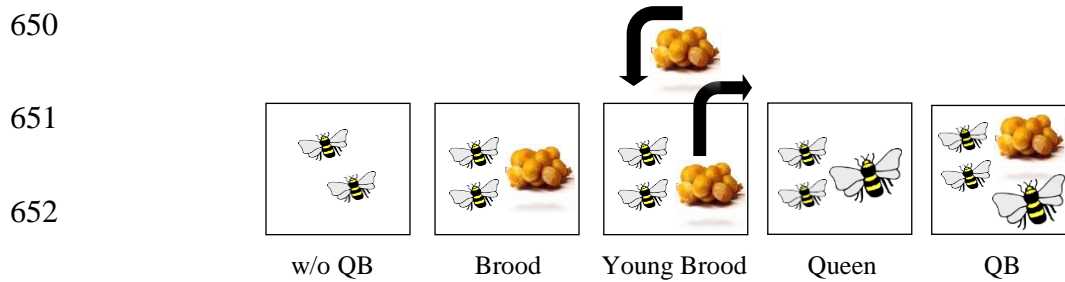

654 Fig. 1B. Diagram of the experimental design of experiment 2

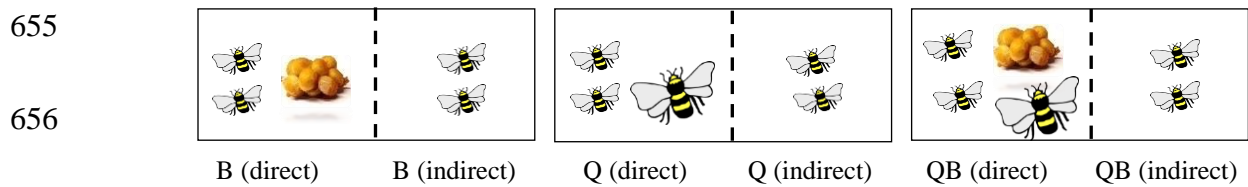

658 Fig. 1C. Diagram of the experimental design of experiment 3a

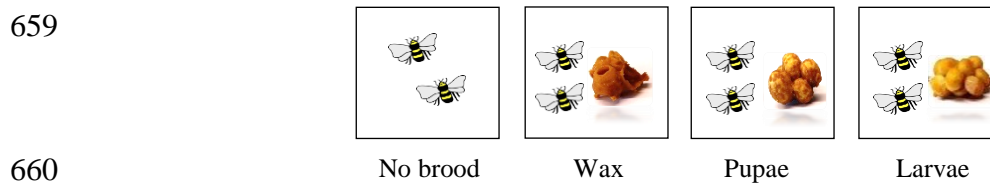

661 Fig 1D. Diagram of the experimental design of experiment 3b

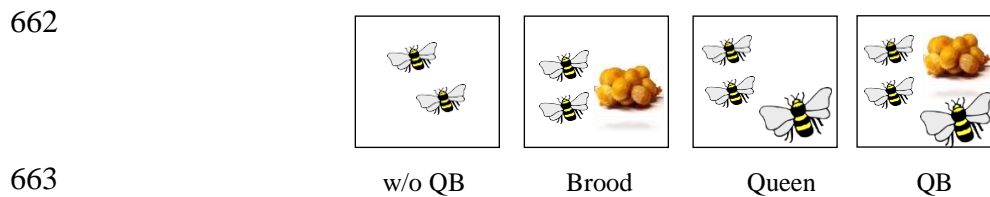

664

665

666



667

Fig. 2

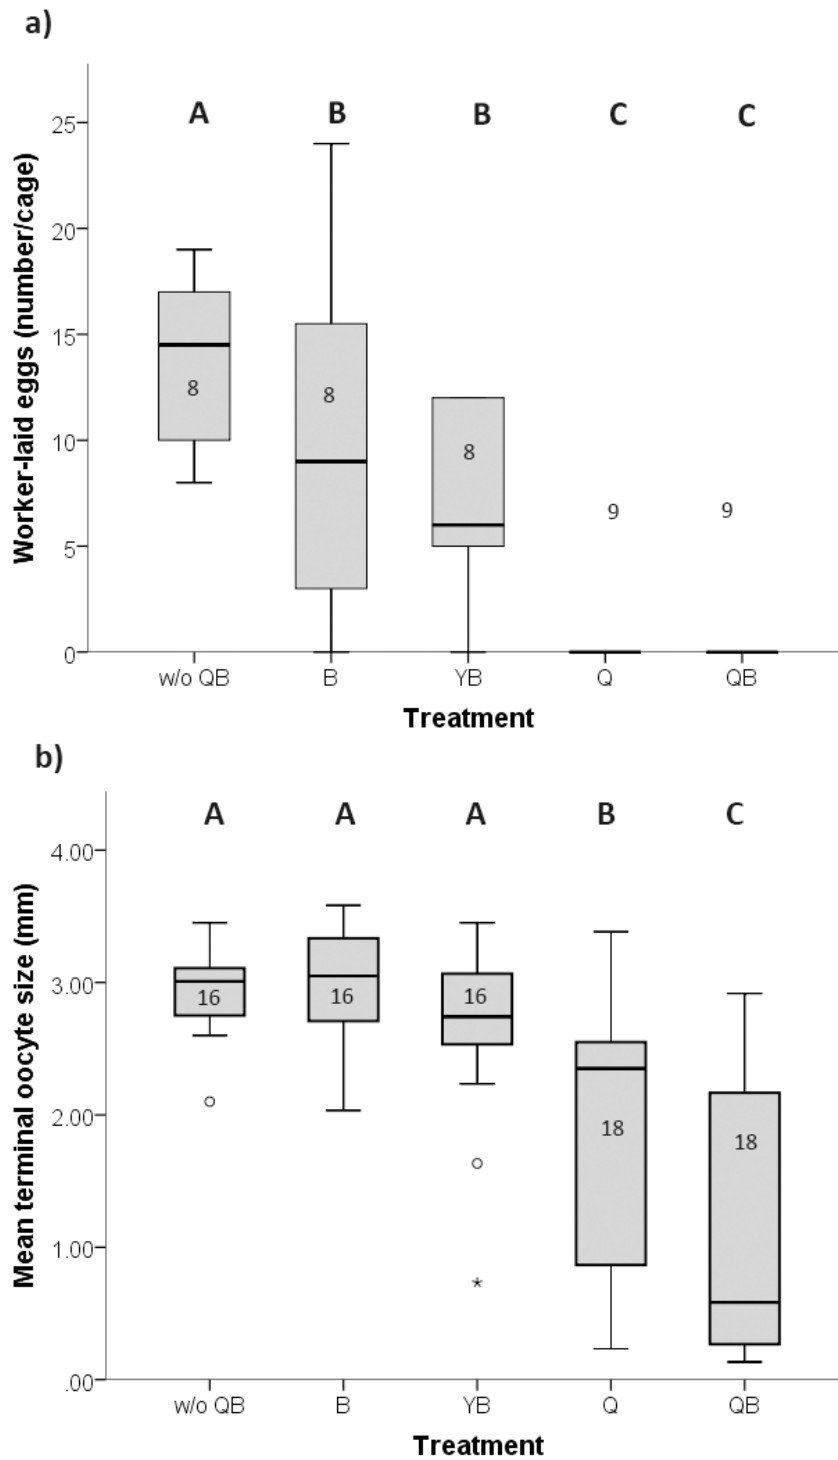

668  
669

670

Fig. 3

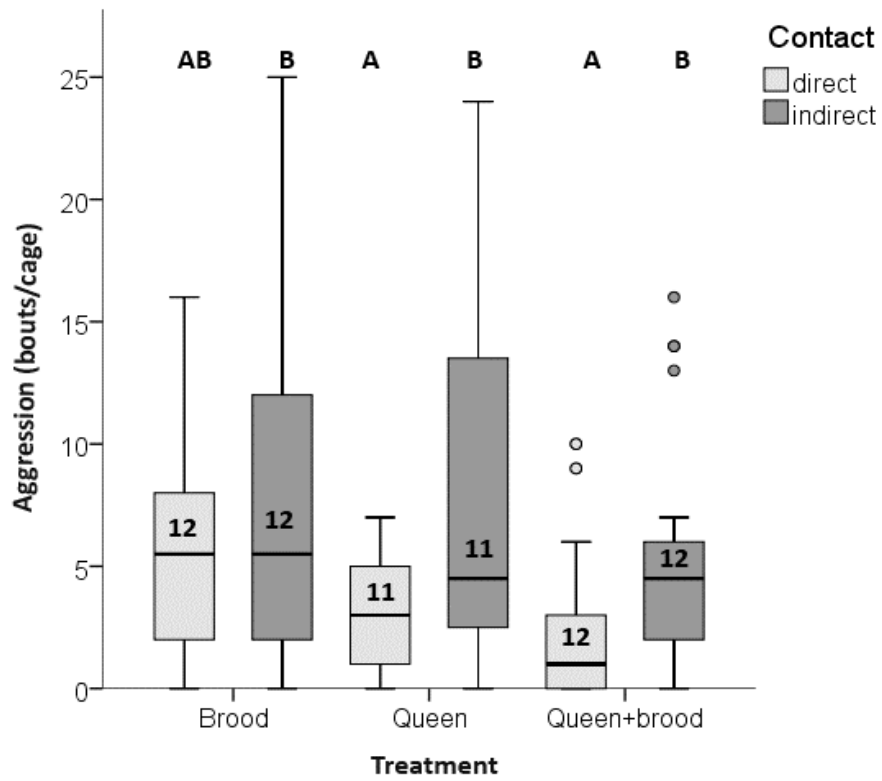

671  
672

673

Fig. 4

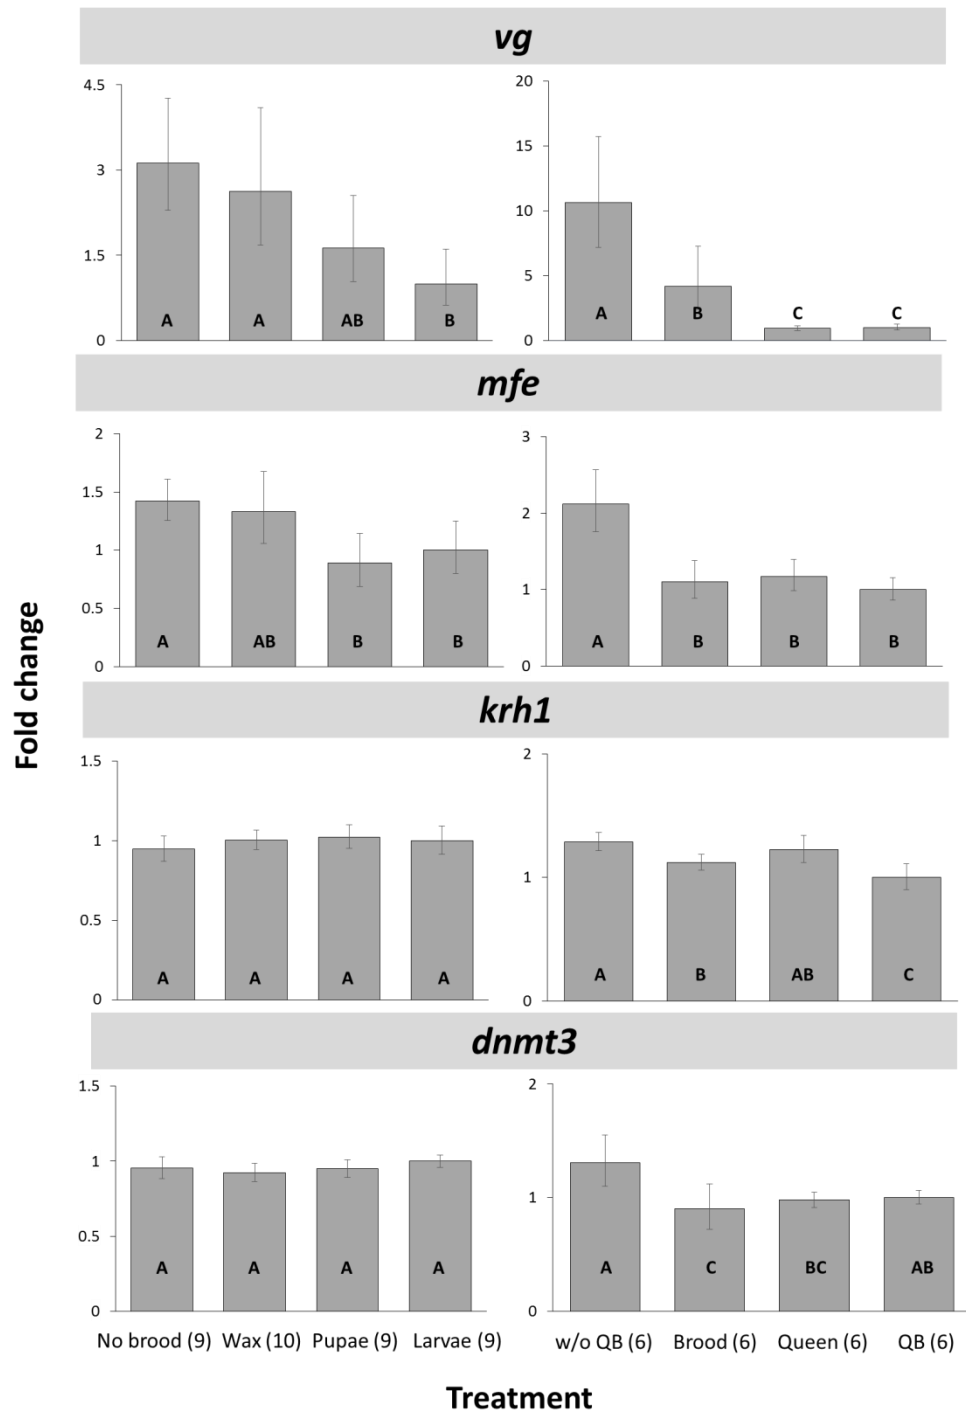

674  
675
